# Supplementary figures and images for: Regulation of retinal axon growth by secreted Vax1 homeodomain protein
Source: eLife journal article supplement (doi:10.7554/elife.02671), 2014-09-08

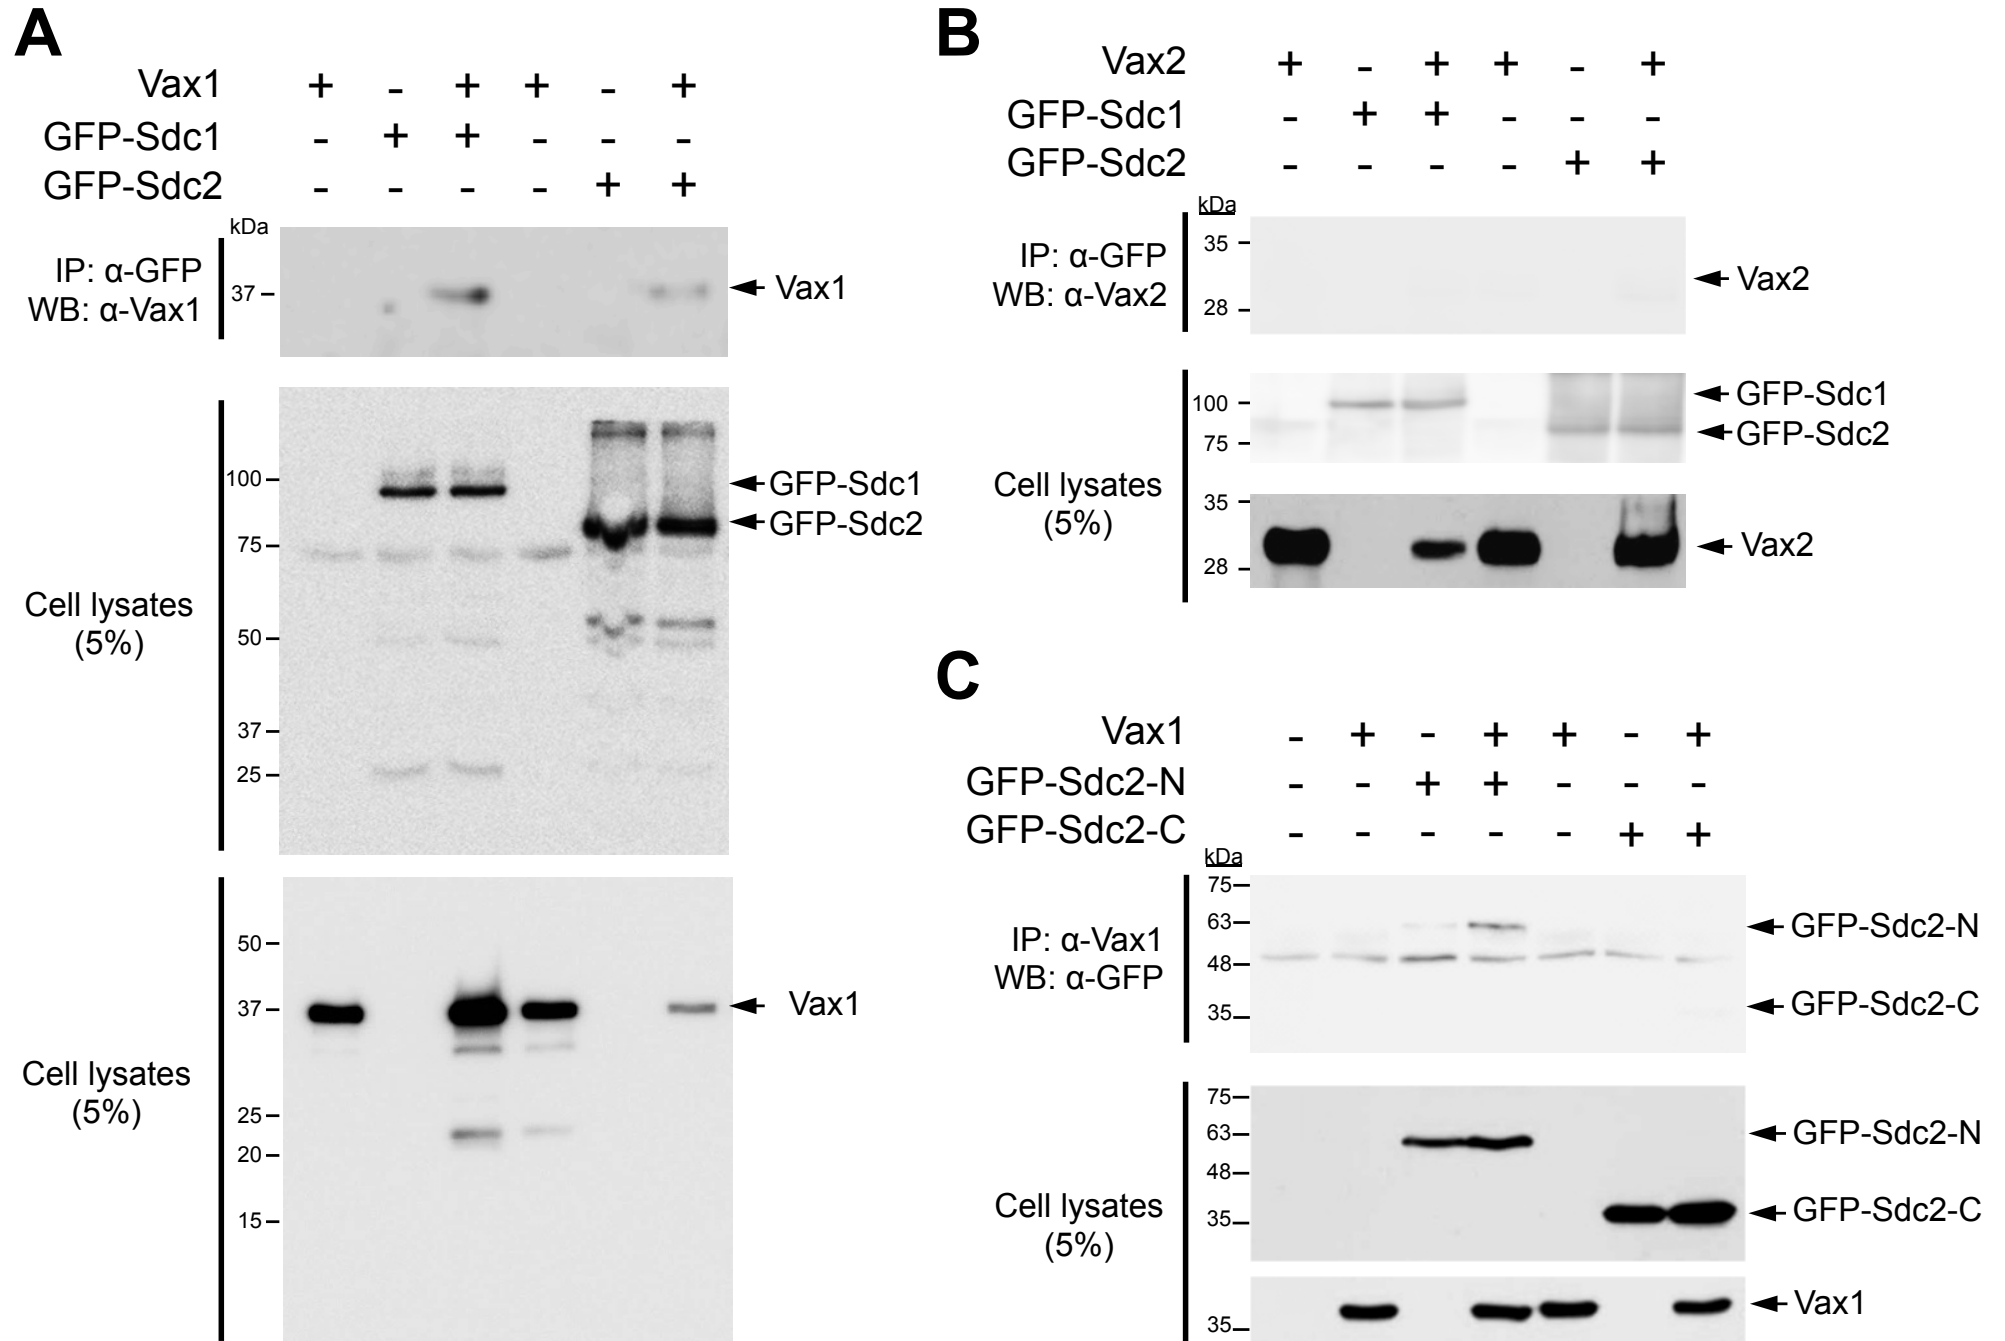

Supplement: supp [file elife-02671-supp-v1.zip]

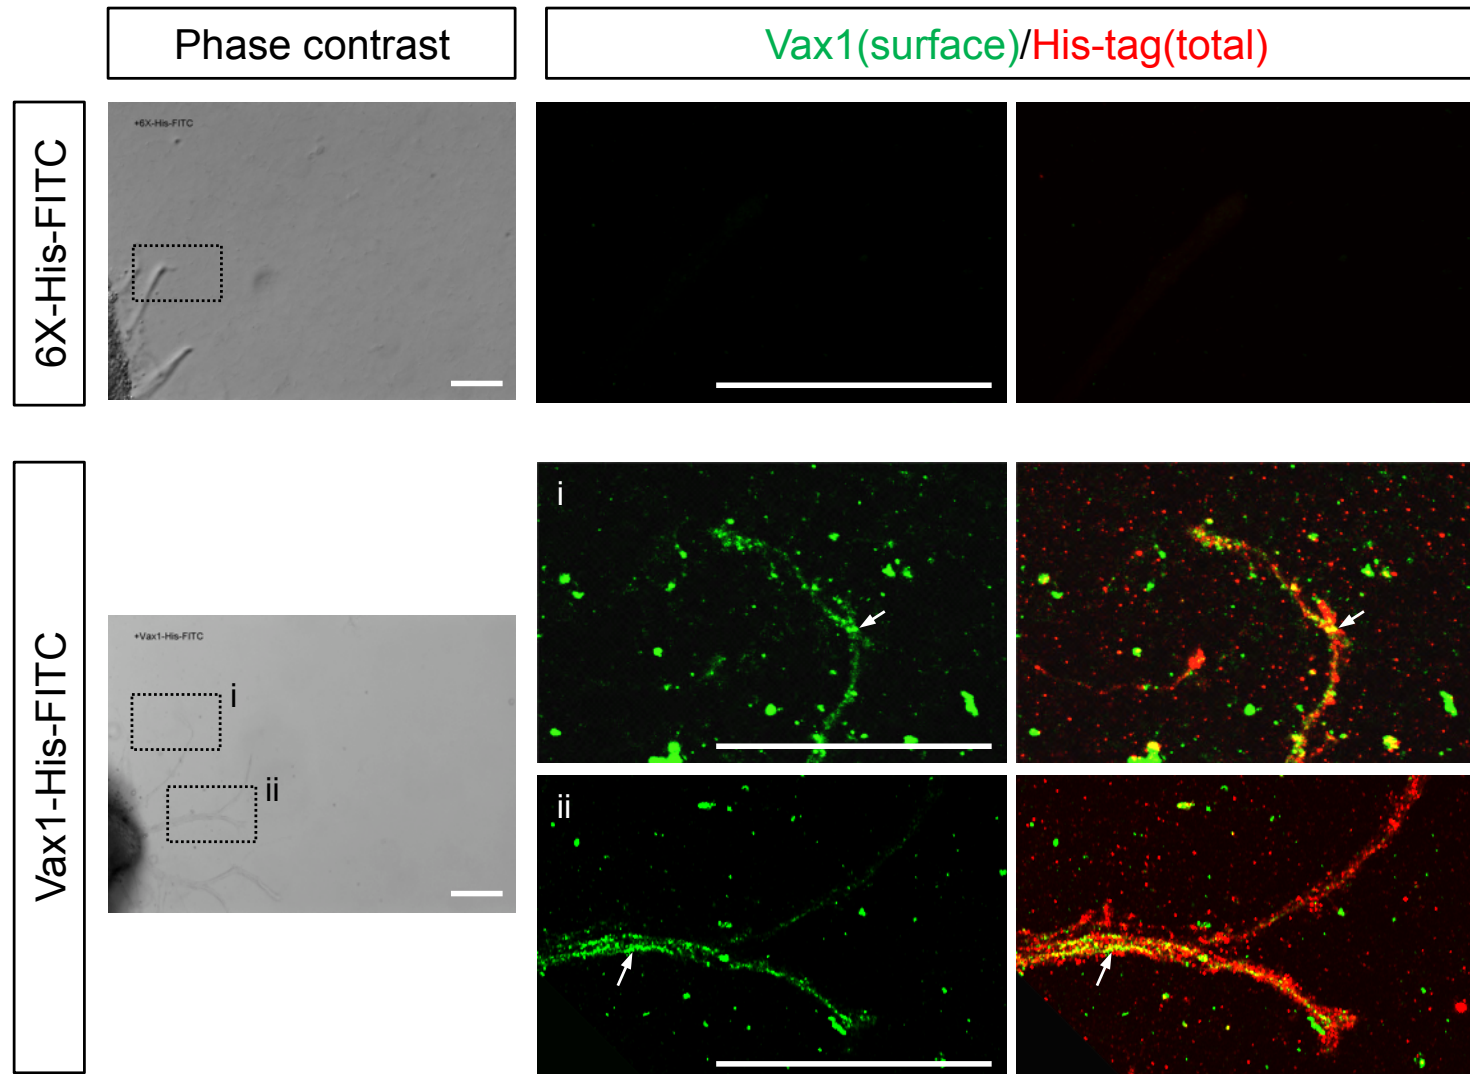

Supplement: supp [file elife-02671-supp-v1.zip]

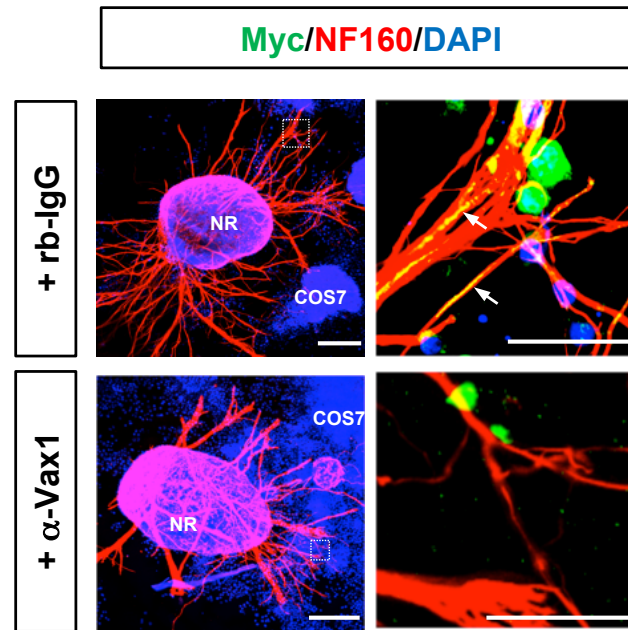

Supplement: supp [file elife-02671-supp-v1.zip]

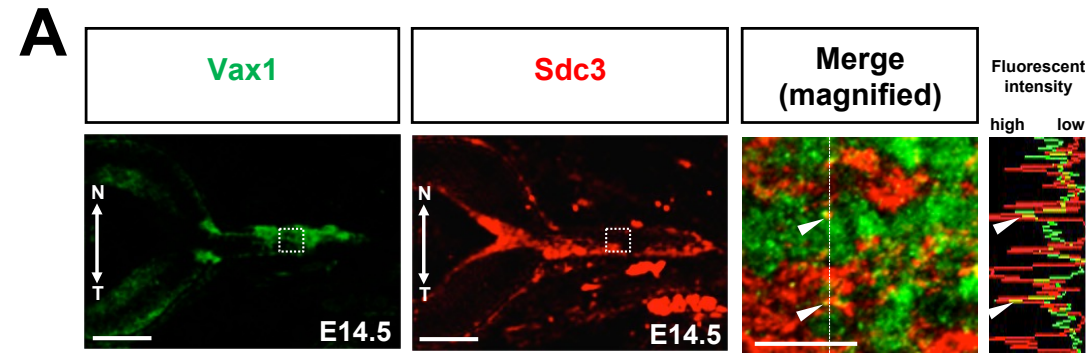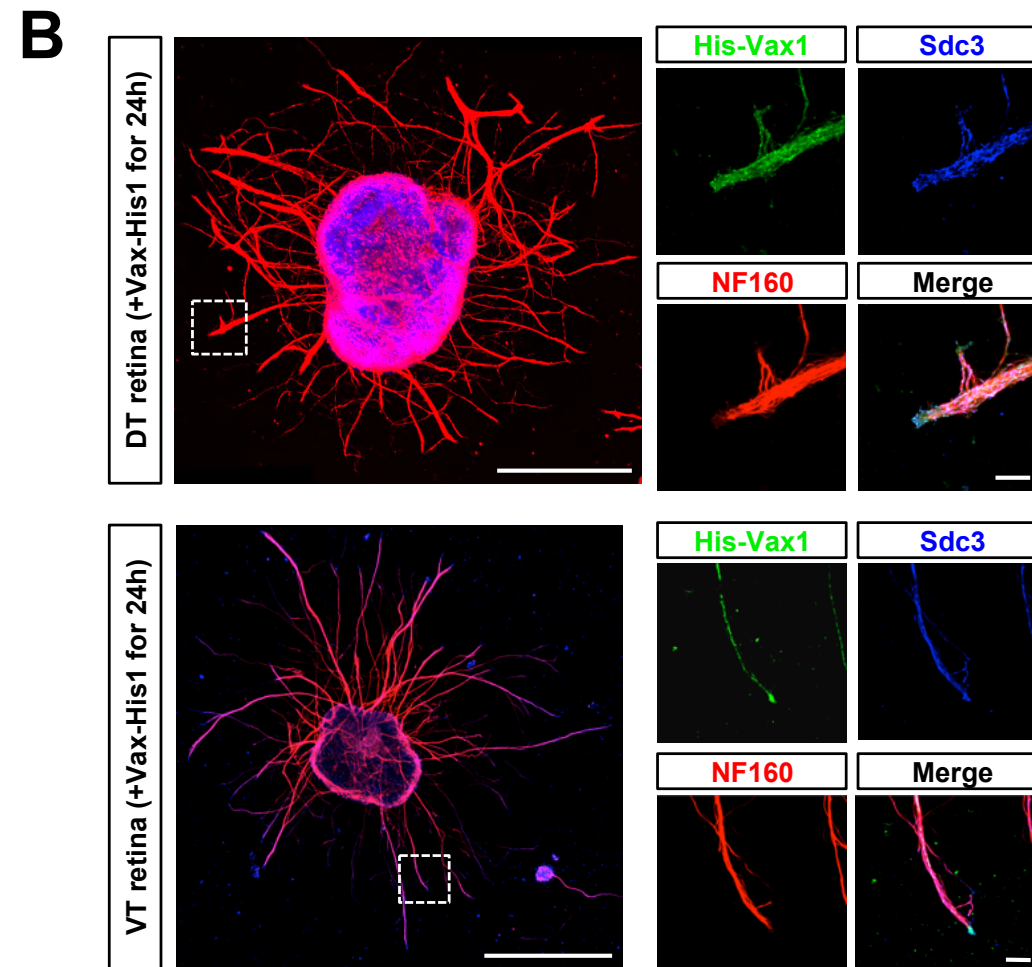

Supplement: supp [file elife-02671-supp-v1.zip]

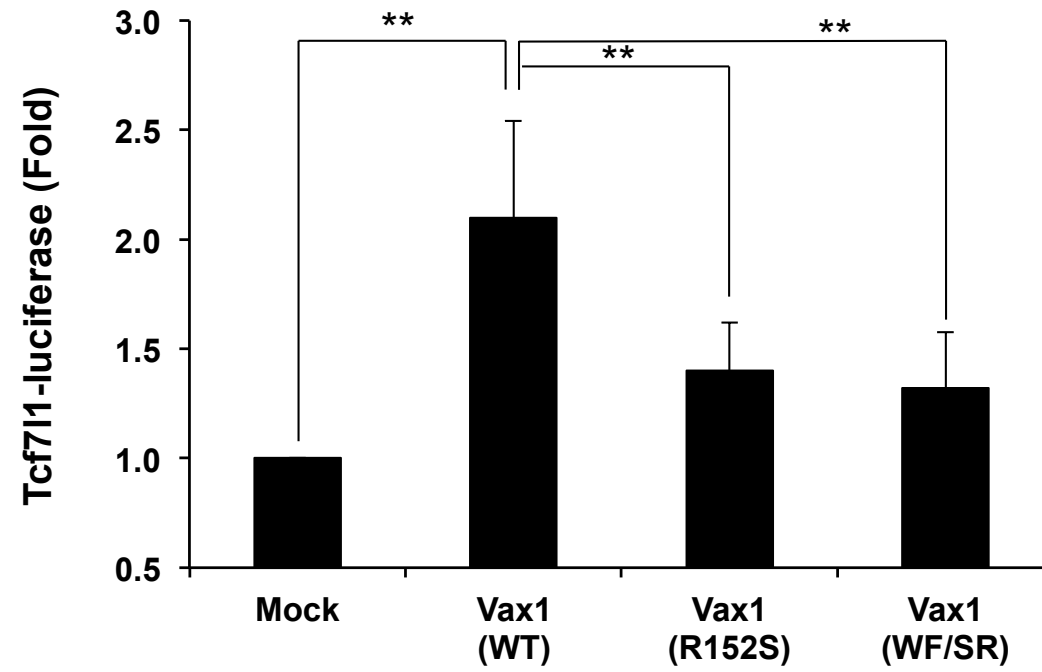

Supplement: supp [file elife-02671-supp-v1.zip]

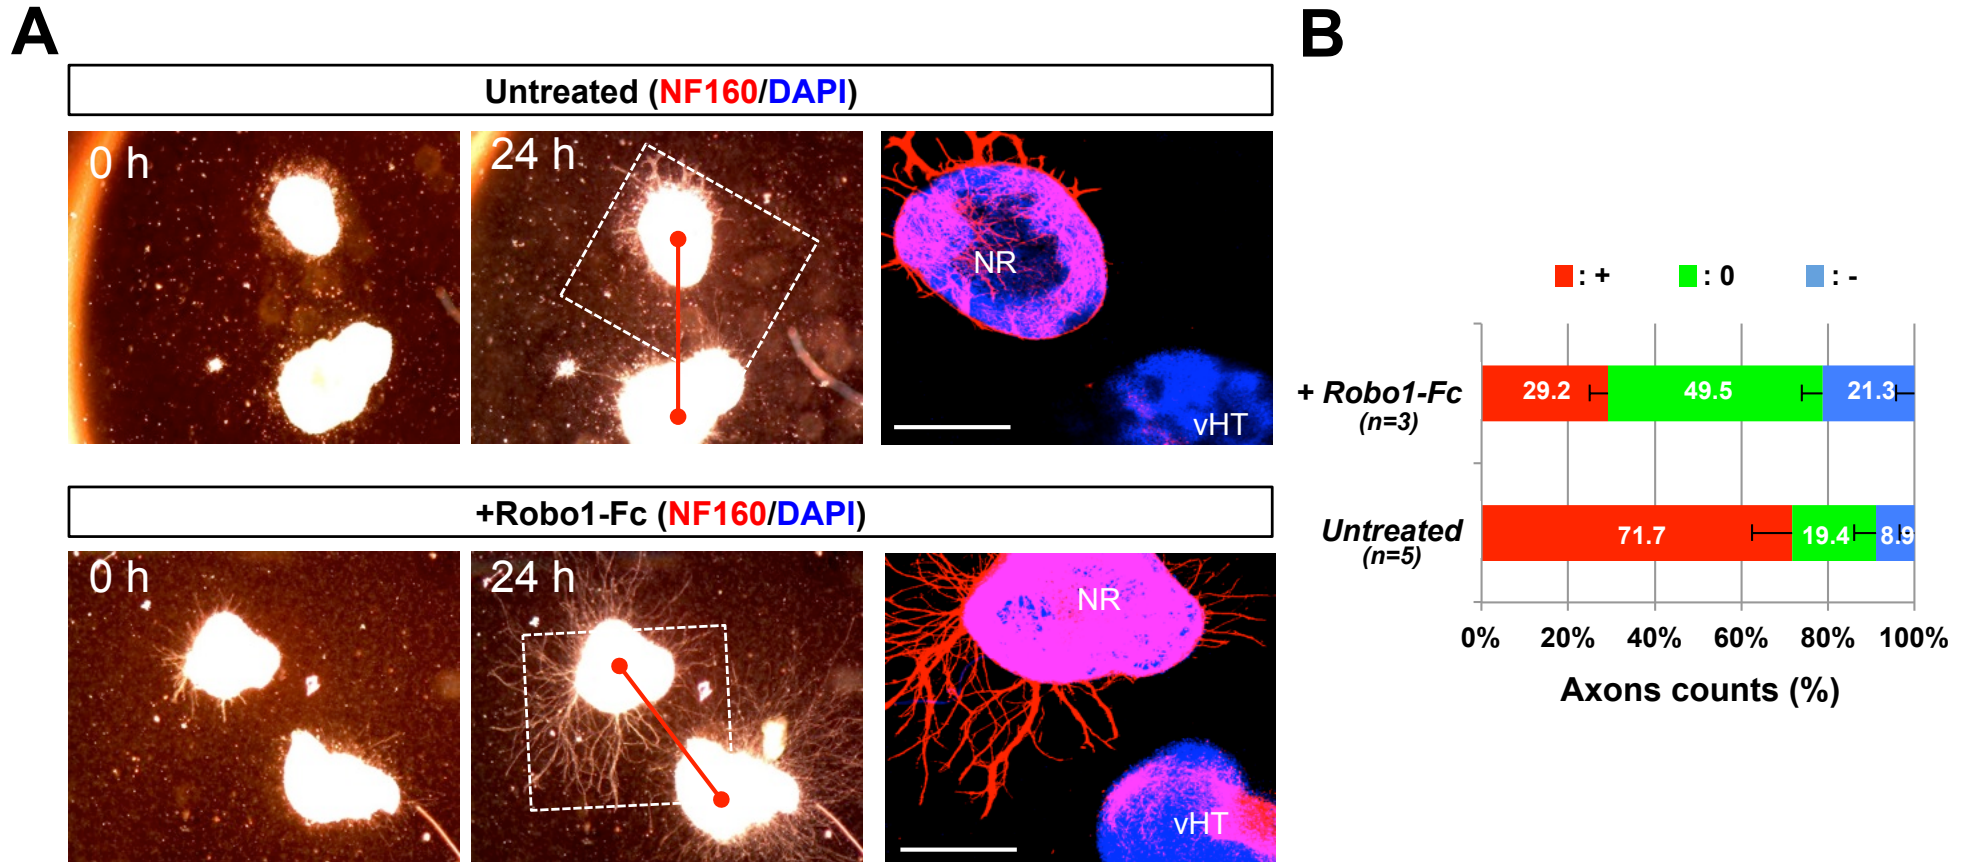

Supplement: supp [file elife-02671-supp-v1.zip]

**A**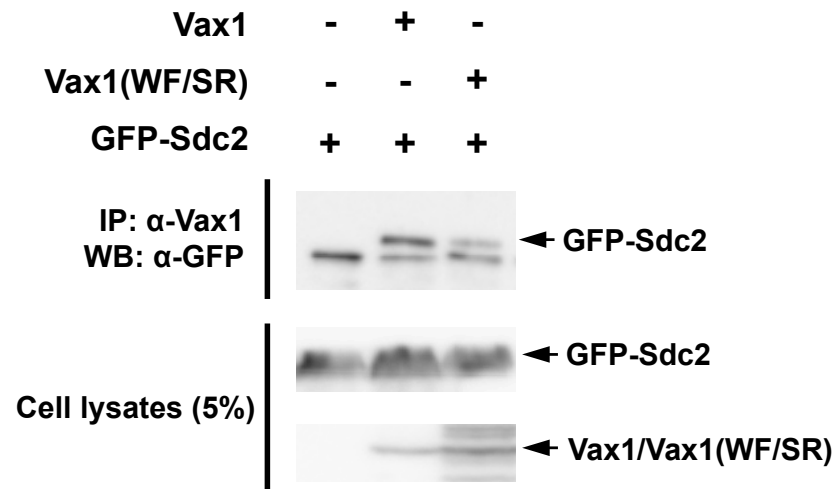**B**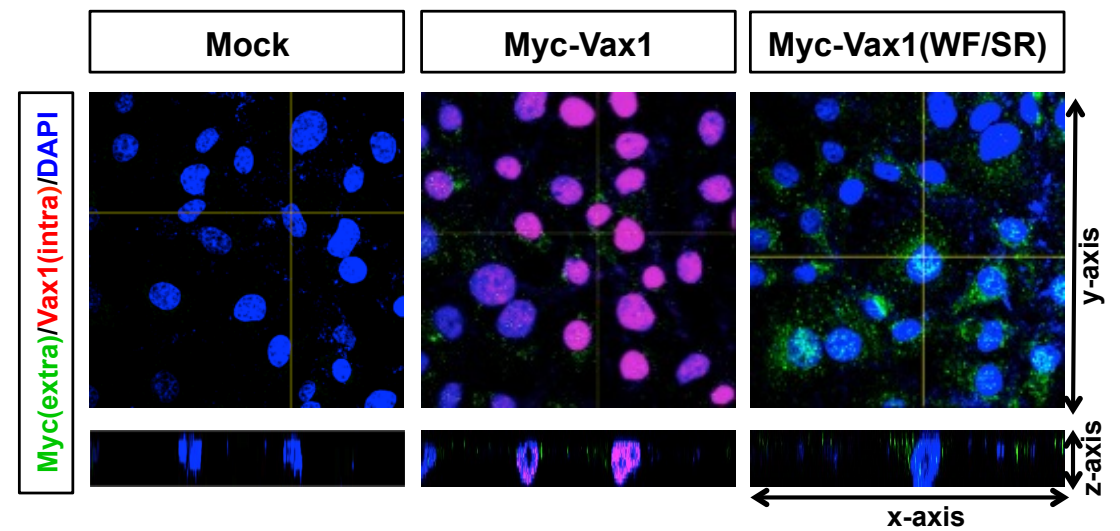**C**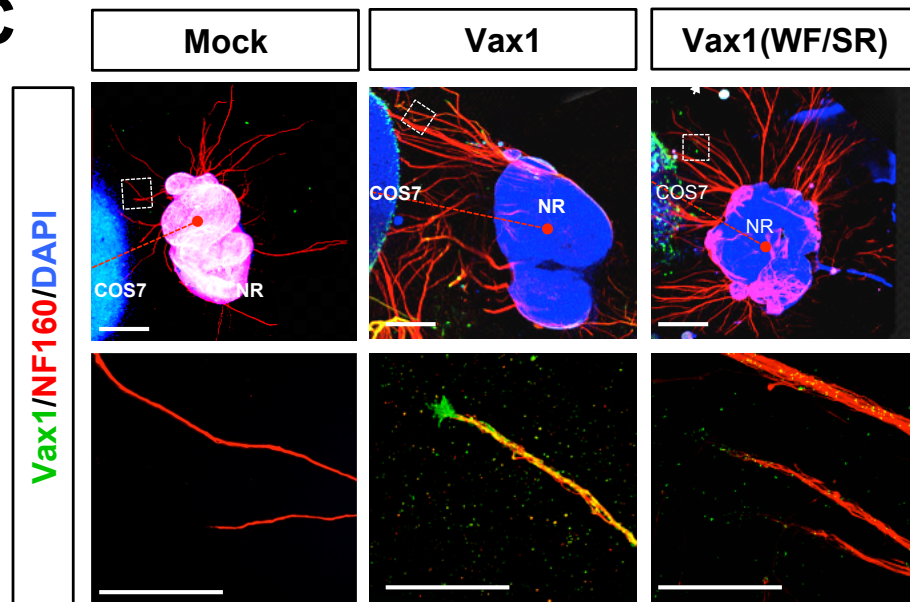**D**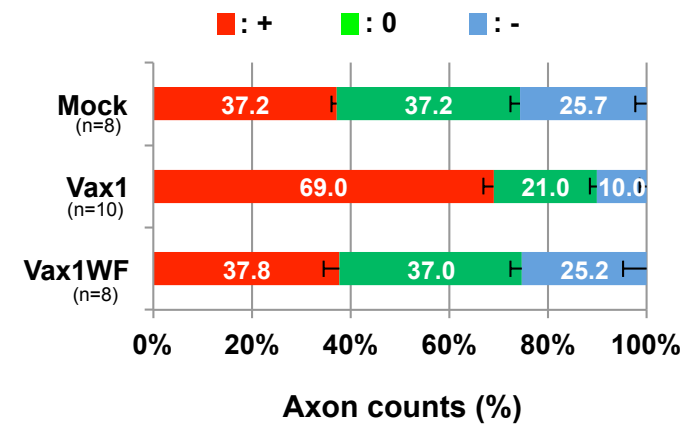

Supplement: supp [file elife-02671-supp-v1.zip]

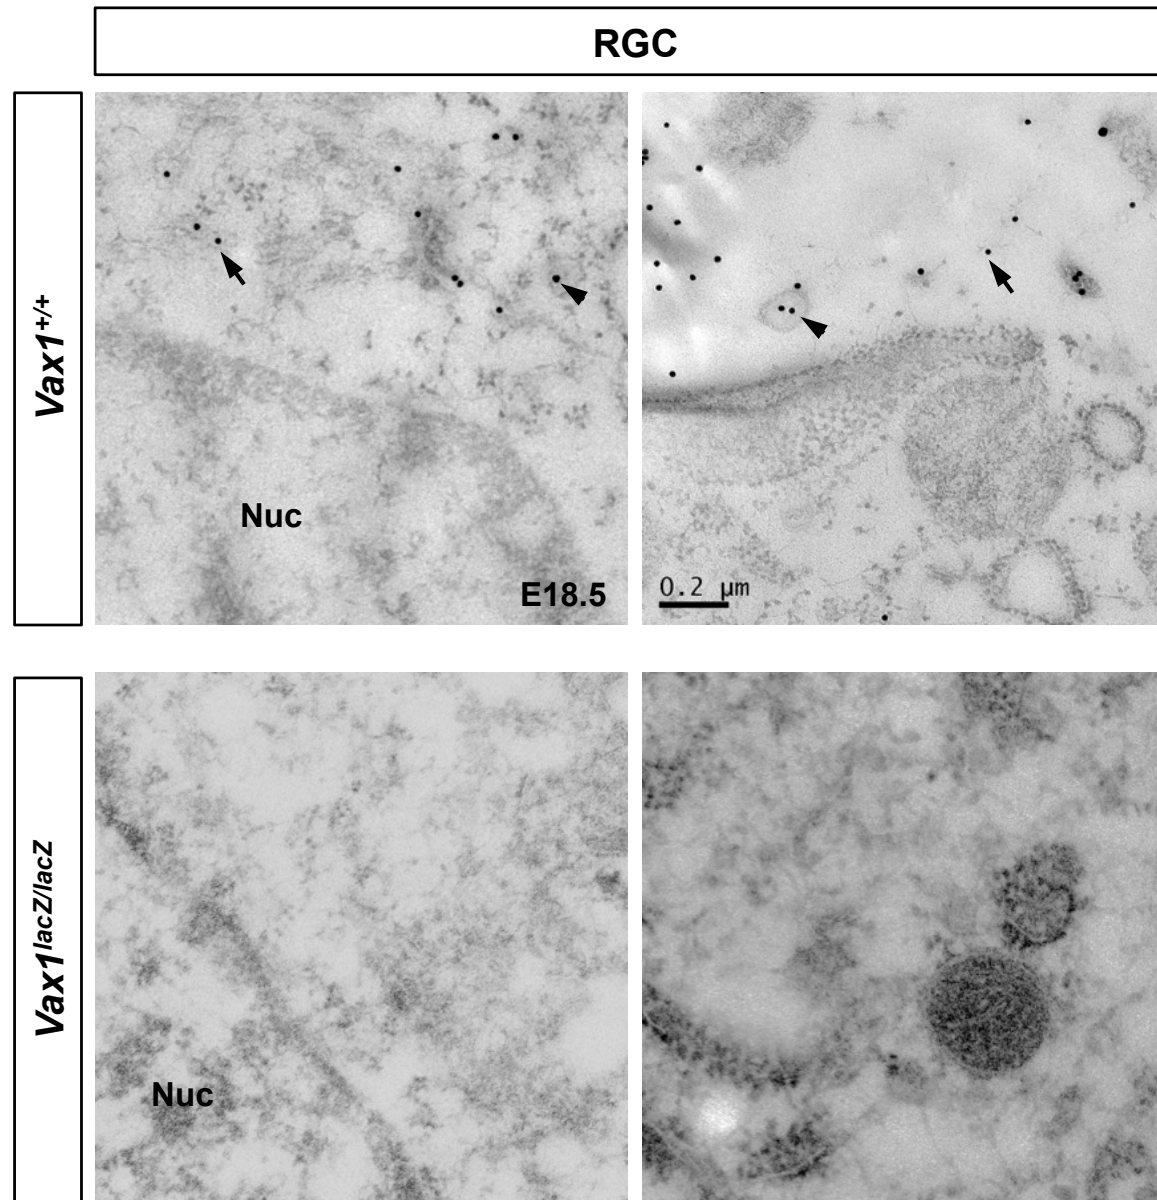

Supplement: supp [file elife-02671-supp-v1.zip]

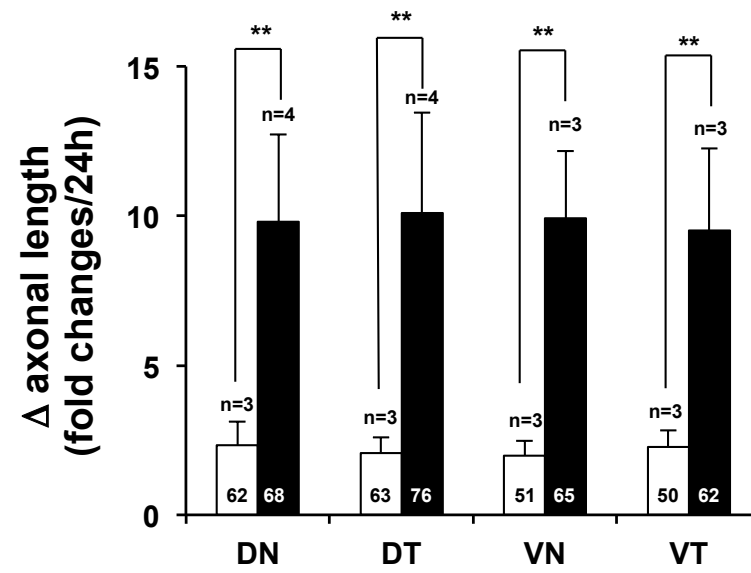

Supplement: supp [file elife-02671-supp-v1.zip]

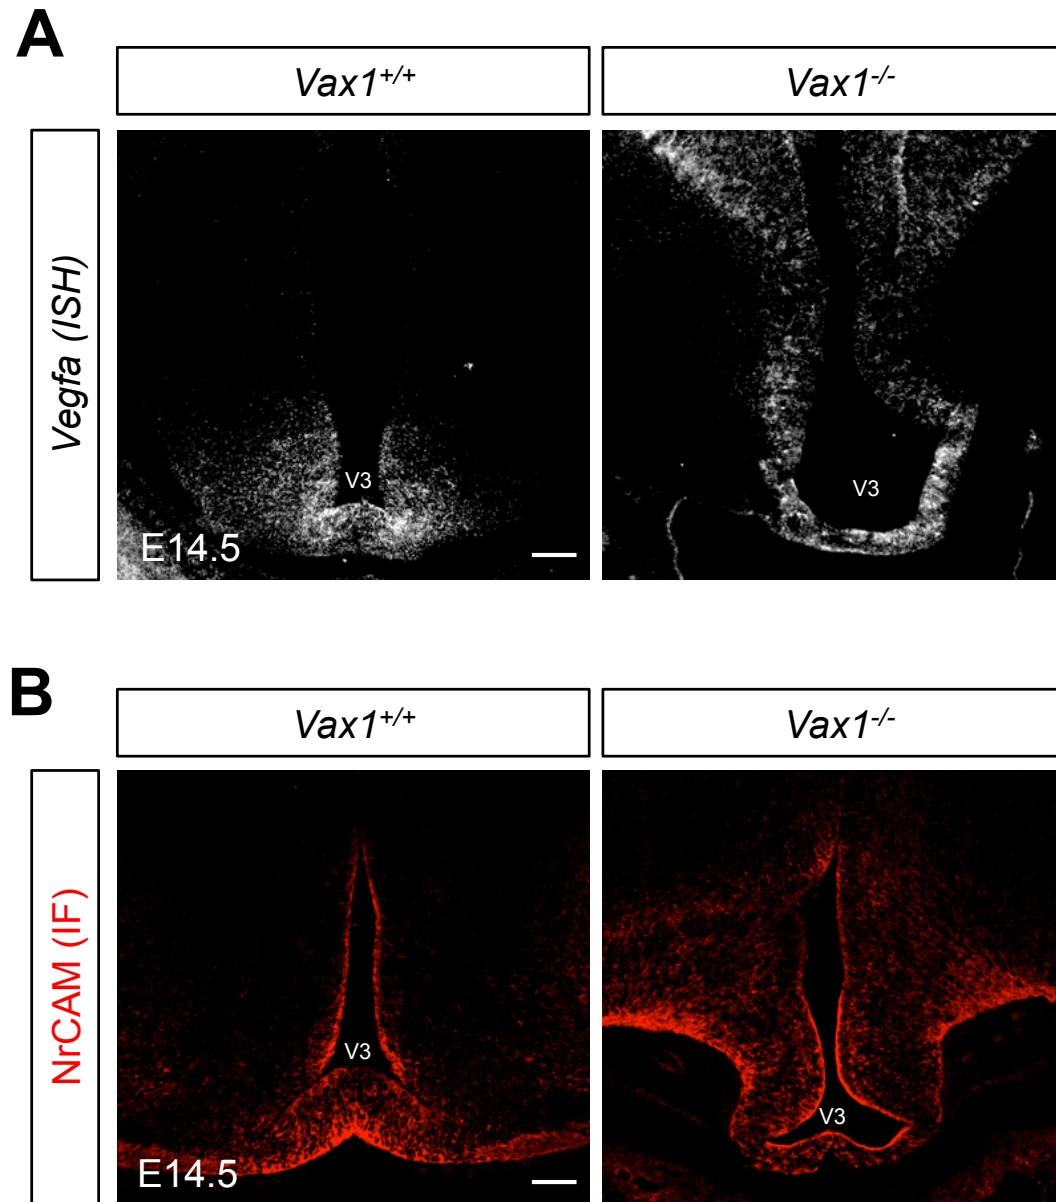

Supplement: supp [file elife-02671-supp-v1.zip]

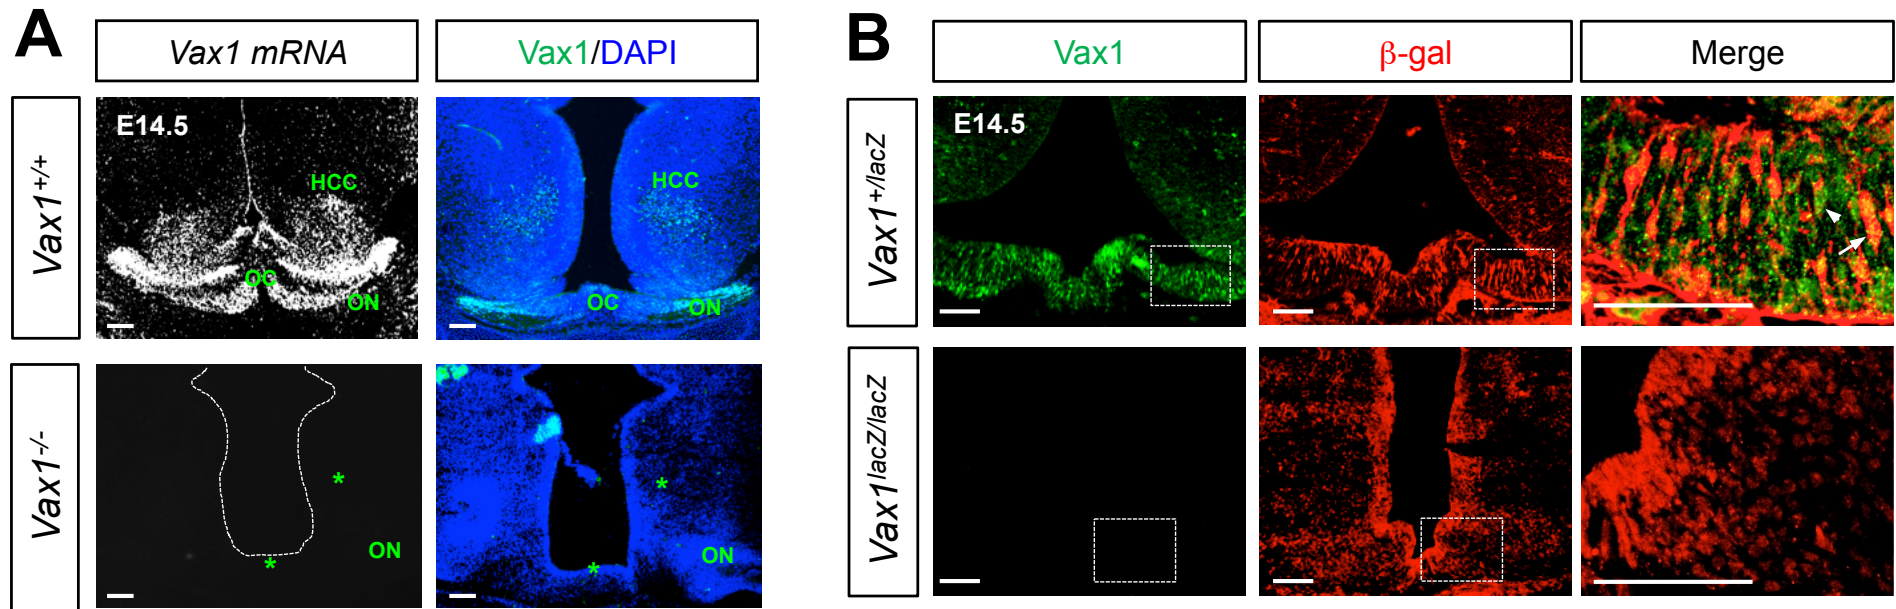

Supplement: supp [file elife-02671-supp-v1.zip]

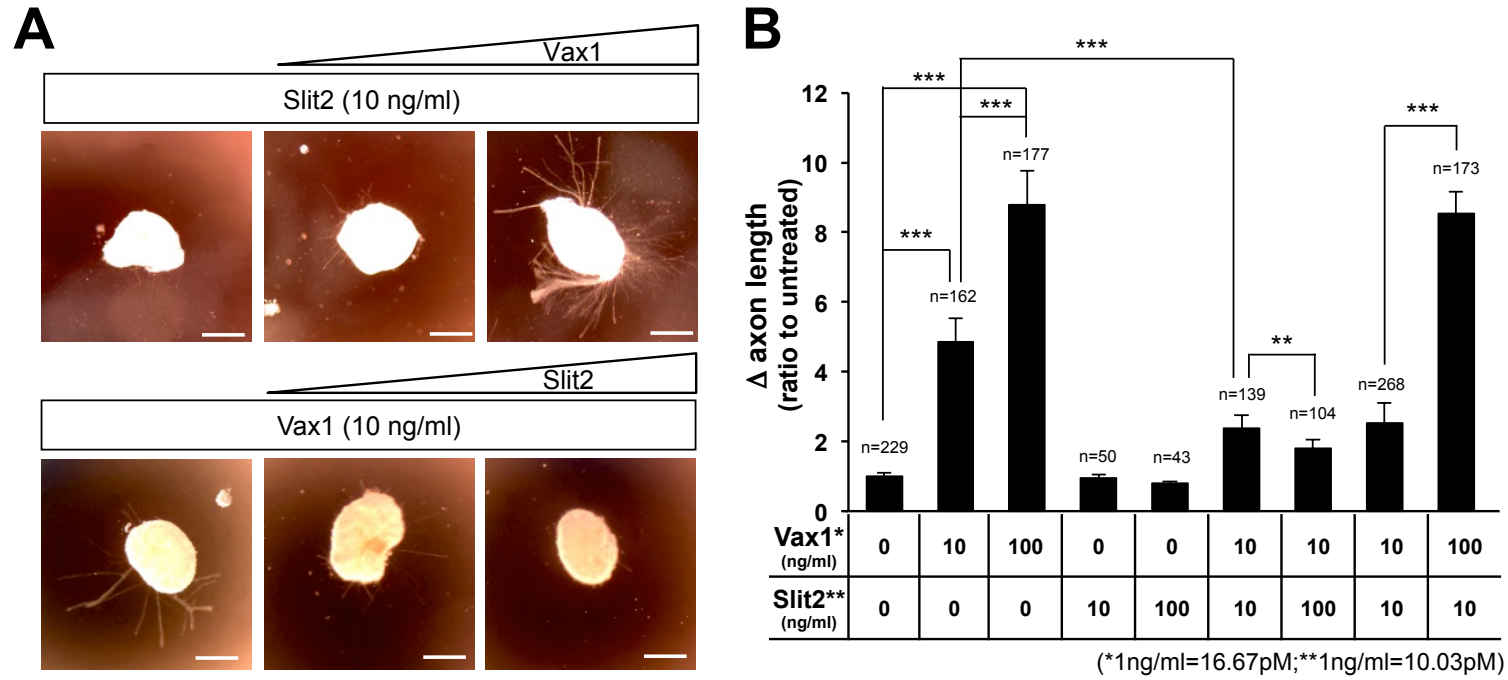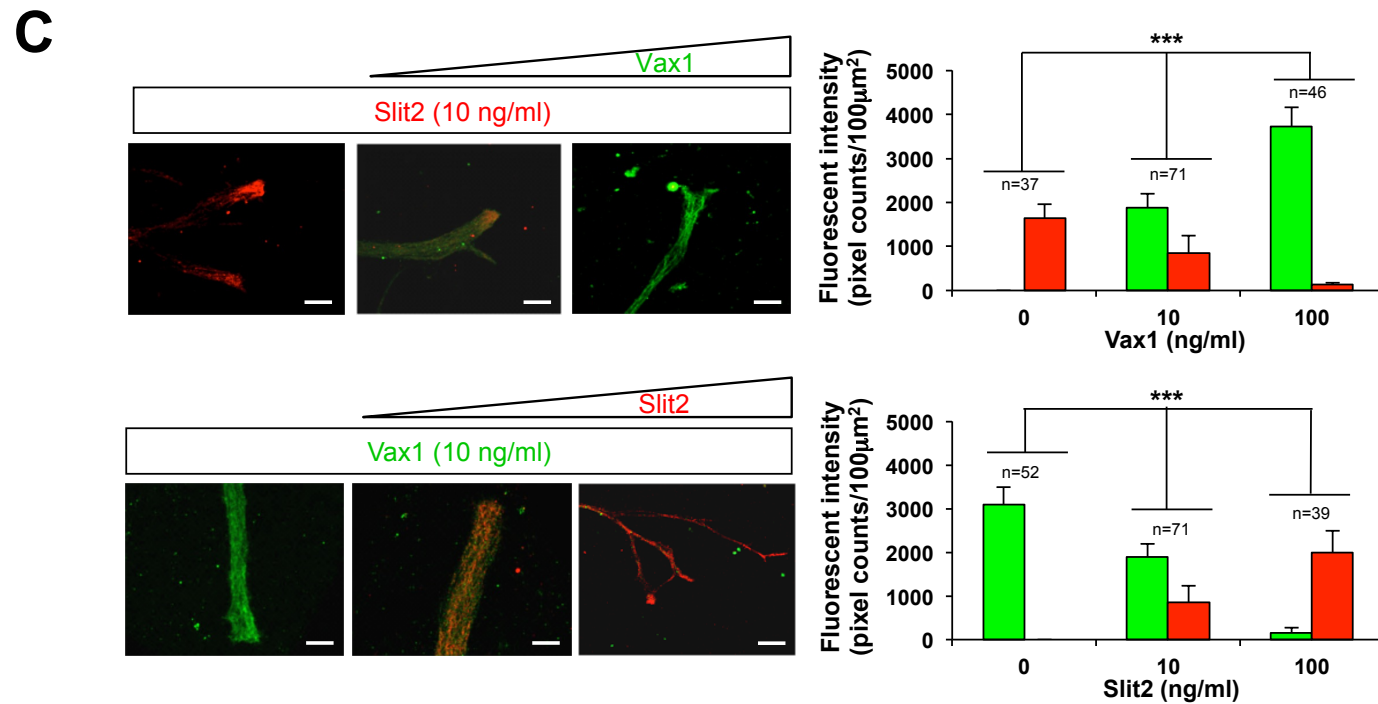

Supplement: supp [file elife-02671-supp-v1.zip]

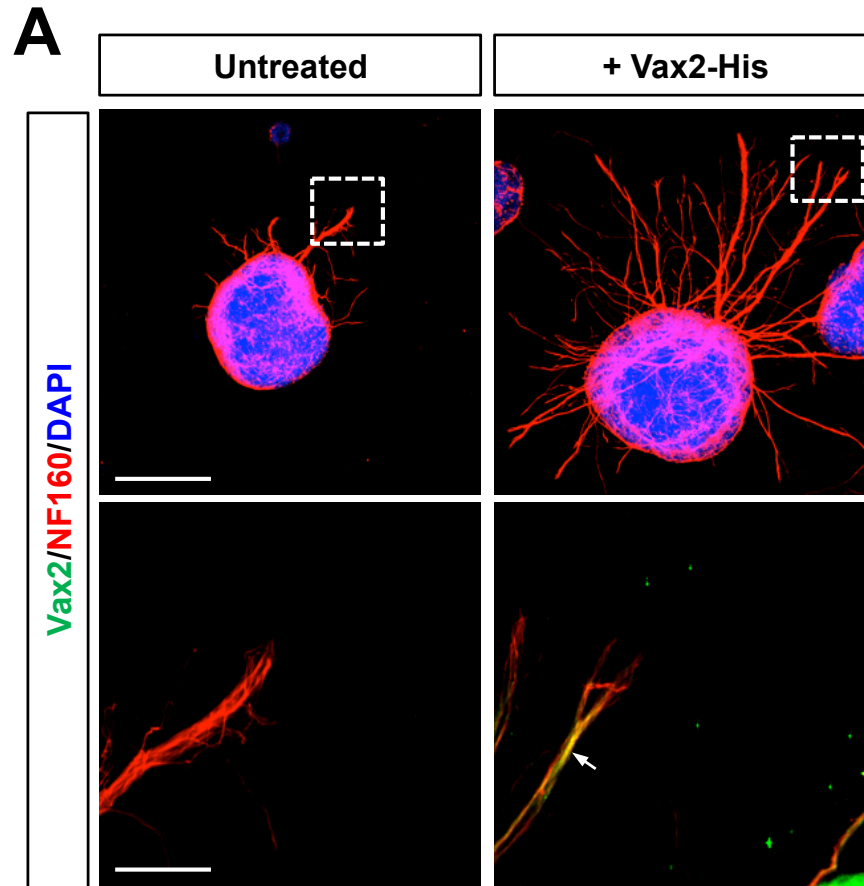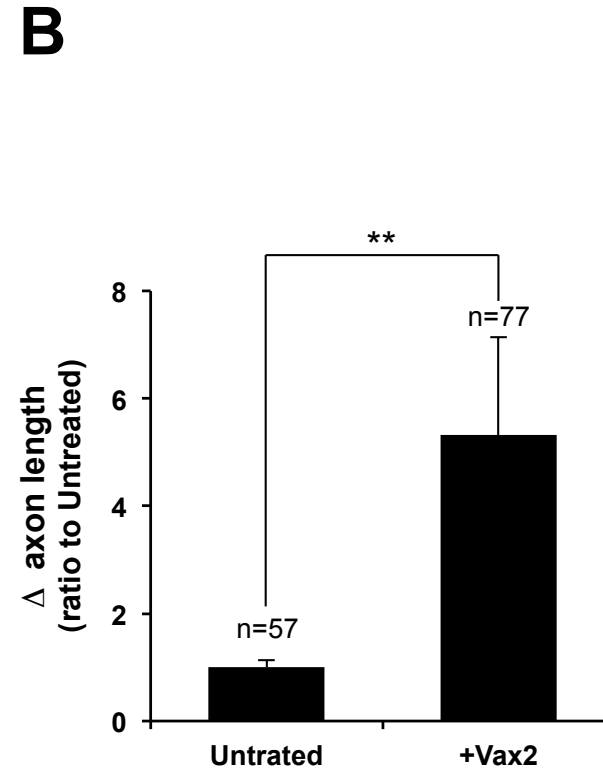

Supplement: supp [file elife-02671-supp-v1.zip]
